# Supplementary material for: The implementation of a community-based aerobic walking program for mild to moderate knee osteoarthritis (OA): a knowledge translation (KT) randomized controlled trial (RCT): Part I: The Uptake of the Ottawa Panel clinical practice guidelines (CPGs)
Source: PubMed Central journal article supplement (PMC3491047; doi:10.1186/1471-2458-12-871), 2012-10-13
Supplement: 1471-2458-12-871-S2.pdf [file 1471-2458-12-871-S2.pdf]

|                 |              | <b>INDIVIDUAL AEROBIC WALKING TRAINING</b> |                                |                                |
|-----------------|--------------|--------------------------------------------|--------------------------------|--------------------------------|
| <b>Week No.</b> | <b>Phase</b> | <b>Duration<br/>(min/day)</b>              | <b>Intensity<br/>(% HRmax)</b> | <b>Frequency<br/>(days/wk)</b> |
| 1-4             | Progression  | 25                                         | 50                             | 3                              |
| 5-8             | Progression  | 30                                         | 55                             | 3                              |
| 9-10            | Progression  | 35                                         | 55                             | 3                              |
| 11-12           | Progression  | 40                                         | 60                             | 3                              |
| 13-16           | Progression  | 45                                         | 60                             | 3                              |
| 17-19           | Progression  | 45                                         | 65                             | 3                              |
| 20-26           | Progression  | 45                                         | 70                             | 3                              |
| 27-52           | Maintenance  | 45                                         | 70                             | 3                              |
