# Supplementary material for: The implementation of a community-based aerobic walking program for mild to moderate knee osteoarthritis (OA): a knowledge translation (KT) randomized controlled trial (RCT): Part I: The Uptake of the Ottawa Panel clinical practice guidelines (CPGs)
Source: BMC Public Health. 2012 Oct 13;12:871. doi: 10.1186/1471-2458-12-871 (PMC3491047; doi:10.1186/1471-2458-12-871)
Supplement: Additional file 1 — The knowledge –to-action framework and KT interventions. This table demonstrates how each step of the KTAC framework is applied to the RCT. [file 1471-2458-12-871-S1.pdf]

| <b>Phase</b>                            | <b>Description</b>                                                                                                                                                                                                                                                                                                                                                                                                                                                                                                         |
|-----------------------------------------|----------------------------------------------------------------------------------------------------------------------------------------------------------------------------------------------------------------------------------------------------------------------------------------------------------------------------------------------------------------------------------------------------------------------------------------------------------------------------------------------------------------------------|
| Knowledge Creation                      | In this study, knowledge was previously created through the use of Ottawa Panel CPGs (2005; 2011; In Press, 2012) and the People Getting a Grip on Arthritis Program ( <a href="http://www.arthritis.ca/peoplegettingagrip">www.arthritis.ca/peoplegettingagrip</a> ) (Brosseau, 2011)                                                                                                                                                                                                                                     |
| Action Cycle                            |                                                                                                                                                                                                                                                                                                                                                                                                                                                                                                                            |
| Identify the knowledge-to-action gaps   | What is the most effective strategy to improve participant compliance to proven effective structured community-based aerobic walking program and improve behaviour change after 12 months among individuals with OA                                                                                                                                                                                                                                                                                                        |
| Adapt knowledge to local context        | Implementing a scientifically proven effective structured community-based aerobic walking program to local walking clubs in Ottawa, Ontario, Canada, and Gatineau, Quebec, Canada                                                                                                                                                                                                                                                                                                                                          |
| Assess barriers to knowledge use        | Strengths and barriers were assessed in a previous pilot study and focus group investigating preferred methods of physical activity. In addition, walking progression and recommendations for OA of the knee were assessed in a previous systematic review (Ottawa Panel, 2005)                                                                                                                                                                                                                                            |
| Select, Tailor, Implement Interventions | The KT interventions were multifaceted consisting either an educational pamphlet (C group), a structured community-based aerobic walking program (W group), or the combination of patient education, a structured community-based aerobic walking program and behavioural techniques such as patient education, goal setting, health counselling, telephone support (WB group).                                                                                                                                            |
| Monitor knowledge use                   | Knowledge use was monitored through the supervision of the structured community-based aerobic walking program and its progression by a physical activity specialist at the walking club. The physical activity specialist was present for a minimum of three weekly sessions (Monday, Wednesday and Friday) over 12 months to supervise the participants in the W and WB groups and to record vital signs and attendance.                                                                                                  |
| Evaluate outcomes                       | Outcomes included knowledge (guidelines) uptake measured by compliance and behavioural changes (self-efficacy and confidence) to the structured community-based aerobic walking program based on Ottawa Panel CPGs (2005; 2011; In Press, 2012) and behavioural change (self-efficacy and confidence) in adopting the SCAWP. Measurement sessions were scheduled every three months over the course of the 18-month project (See part II for more details on outcome evaluation for quality of life and clinical outcomes) |
| Sustained Knowledge Use                 | Volunteers at the existing walking clubs took over during the follow-up phase between 12 and 18 months and will hopefully implement the same long-term program beyond the study.                                                                                                                                                                                                                                                                                                                                           |
