# Supplementary material for: The implementation of a community-based aerobic walking program for mild to moderate knee osteoarthritis (OA): a knowledge translation (KT) randomized controlled trial (RCT): Part I: The Uptake of the Ottawa Panel clinical practice guidelines (CPGs)
Source: BMC Public Health. 2012 Oct 13;12:871. doi: 10.1186/1471-2458-12-871 (PMC3491047; doi:10.1186/1471-2458-12-871)
Supplement: Additional file 3 — Reasons of dropouts. This table demonstrates the reasons as to why participants decided to withdraw from the study. [file 1471-2458-12-871-S3.pdf]

| <b>Reasons</b>                                    | <b>W</b>  | <b>WB</b> | <b>C</b>  | <b>Total</b> |
|---------------------------------------------------|-----------|-----------|-----------|--------------|
| Unable to contact after admission                 | 8         | 2         | 10        | 20           |
| No motivation                                     | 0         | 2         | 1         | 3            |
| No MD clearance after 2 <sup>nd</sup> VO2max test | 0         | 3         | 3         | 6            |
| Time commitment                                   | 5         | 3         | 5         | 13           |
| No OA when based on X-Rays or MRI                 | 1         | 2         | 2         | 5            |
| Health problems                                   | 7         | 7         | 7         | 21           |
| Transportation                                    | 1         | 2         | 0         | 3            |
| Personal/family reasons                           | 7         | 1         | 2         | 10           |
| Knee surgery                                      | 2         | 0         | 3         | 5            |
| Injury                                            | 3         | 2         | 1         | 6            |
| Did not like structure of program                 | 0         | 1         | 1         | 2            |
| No specific reason                                | 0         | 1         | 3         | 3            |
| Moved away                                        | 1         | 2         | 0         | 3            |
| <b>Total</b>                                      | <b>35</b> | <b>28</b> | <b>38</b> | <b>101</b>   |
