# Supplementary material for: The implementation of a community-based aerobic walking program for mild to moderate knee osteoarthritis (OA): a knowledge translation (KT) randomized controlled trial (RCT): Part I: The Uptake of the Ottawa Panel clinical practice guidelines (CPGs)
Source: BMC Public Health. 2012 Oct 13;12:871. doi: 10.1186/1471-2458-12-871 (PMC3491047; doi:10.1186/1471-2458-12-871)
Supplement: Additional file 4 — Dropout rates and corresponding retention rates at 12-and 18-month time periods. This table demonstrates the drop-out rates and retention rates at end of intervention 12-months and follow-up at 18-months. [file 1471-2458-12-871-S4.pdf]

| <b>Time periods</b>                      | <b>W group</b> | <b>WB group</b> | <b>Self-directed group<br/>(C)</b> |
|------------------------------------------|----------------|-----------------|------------------------------------|
| <b>Supervised phase at<br/>12 months</b> |                |                 |                                    |
| Dropout rate                             | 34/79 (43.1%)  | 28/69 (40.6%)   | 36/73 (49.3%)                      |
| Retention rate                           | 45/79 (56.9%)  | 41/69 (59.4%)   | 37/73 (50.7%)                      |
| <b>Follow-up phase at<br/>18 months</b>  |                |                 |                                    |
| Dropout rate                             | 35/79 (44.3%)  | 28/69 (40.6%)   | 38/73 (52.1%)                      |
| Retention rate                           | 44/79 (55.7%)  | 41/69 (59.4%)   | 35/73 (47.9%)                      |
